# Supplementary material for: High-Performance Aqueous Zinc-Ion Batteries Realized by MOF Materials
Source: PubMed Central journal article supplement (PMC7770854; doi:10.1007/s40820-020-00487-1), 2020-07-17
Supplement: 40820_2020_487_MOESM1_ESM.pdf [file 40820_2020_487_MOESM1_ESM.pdf]

Supporting Information for

## High-Performance Aqueous Zinc-Ion Batteries Realized by MOF Materials

Xuechao Pu<sup>1,2</sup>, Baozheng Jiang<sup>1,3</sup>, Xianli Wang<sup>1</sup>, Wenbao Liu<sup>1,2</sup>, Liubing Dong<sup>4,\*</sup>, Feiyu Kang<sup>1,2</sup>, Chengjun Xu<sup>1,\*</sup>

<sup>1</sup>Shenzhen Geim Graphene Center, Tsinghua Shenzhen International Graduate School, Tsinghua University, Shenzhen 518055, People's Republic of China

<sup>2</sup>State Key Laboratory of New Ceramics and Fine Processing, School of Materials Science and Engineering, Tsinghua University, Beijing 100084, People's Republic of China

<sup>3</sup>Tsinghua-Berkeley Shenzhen Institute (TBSI), Tsinghua University, Shenzhen 518055, People's Republic of China

<sup>4</sup>College of Chemistry and Materials Science, Jinan University, Guangzhou 511443, People's Republic of China

\*Corresponding authors. E-mail: donglb@jnu.edu.cn (L. Dong); vivaxuchengjun@163.com (C. Xu)

### Supplementary Figures and Tables

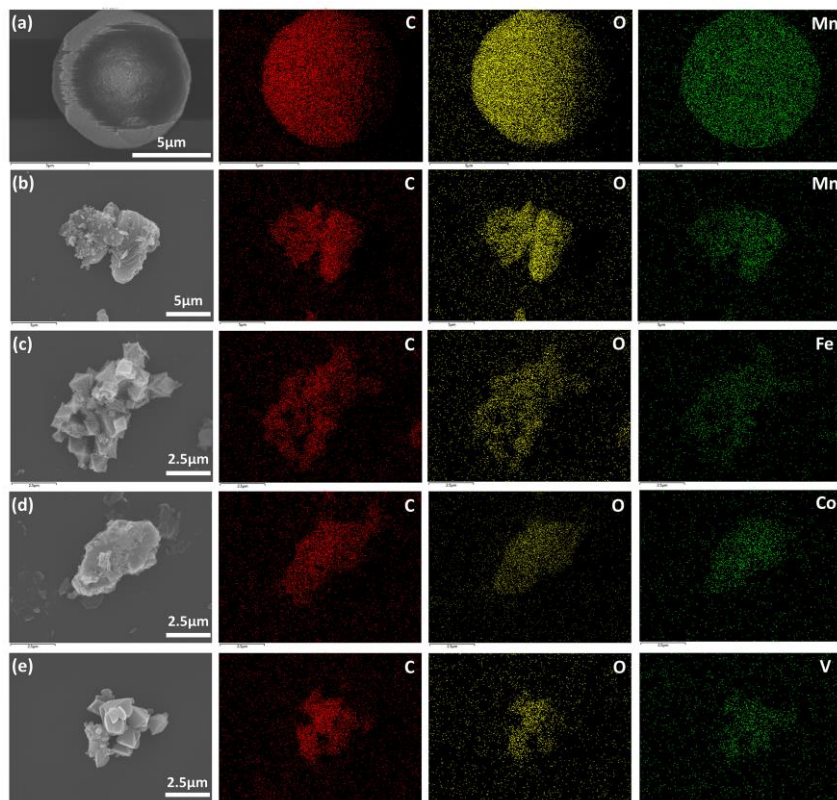

**Fig. S1** EDS images of (a) Mn(BTC), (b) Mn(BDC), (c) Fe(BDC), (d) Co(BDC), and (e) V(BDC) particles

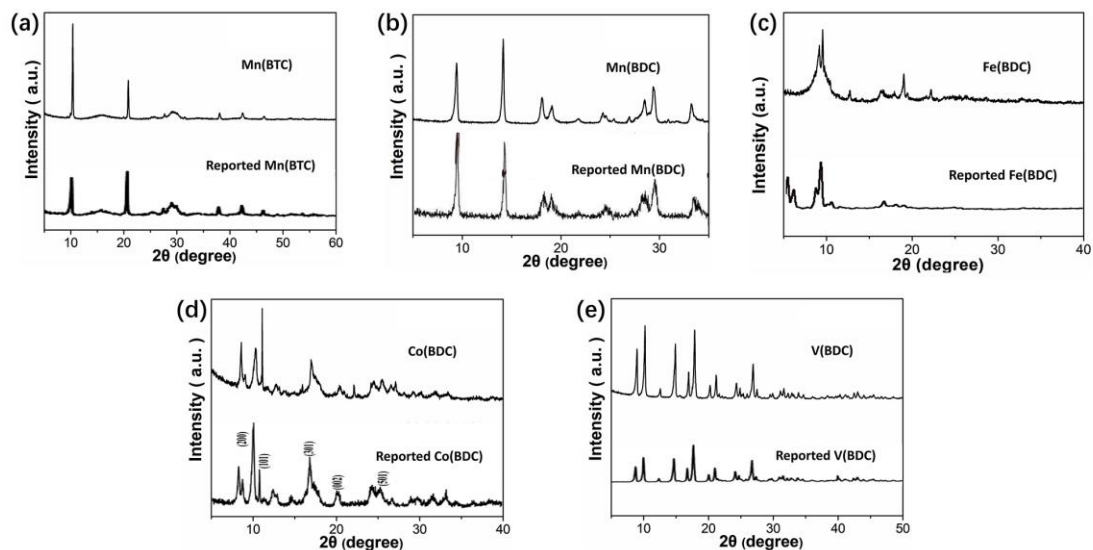

**Fig. S2** XRD patterns comparison of as-prepared MOFs and the literature reported MOFs: (a) Mn(BTC), (b) Mn(BDC), (c) Fe(BDC), (d) Co(BDC), and (e) V(BDC) [S1-S5]

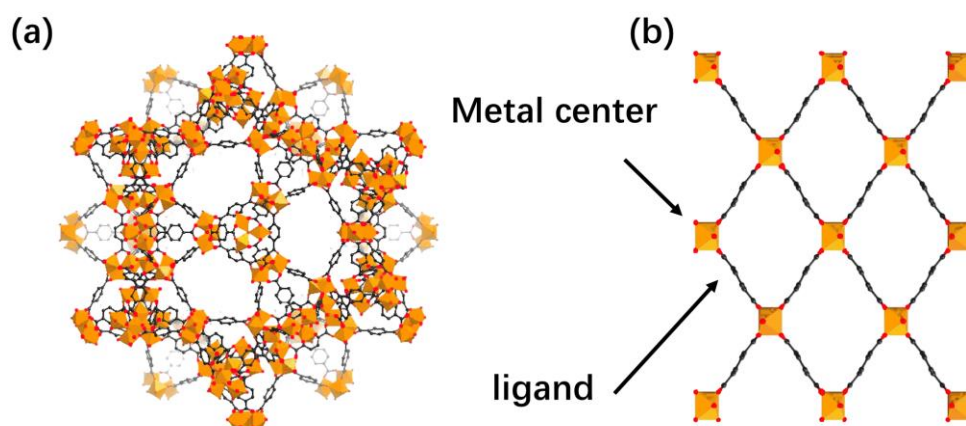

**Fig. S3** Crystal structures of synthesized MOFs materials: (a) Fe(BDC) and (b) V(BDC). The crystalline structures of Mn(BTC), Mn(BDC) and Co(BDC) remain unknown

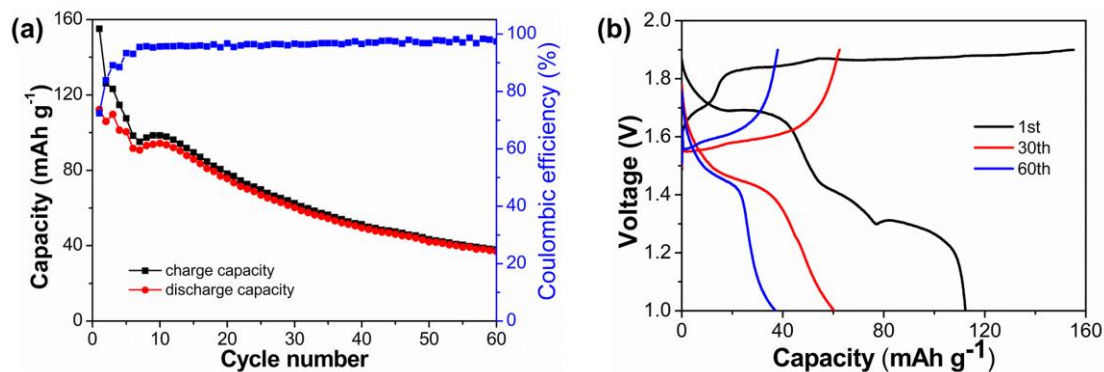

**Fig. S4** Electrochemical performance of the Mn(BTC) cathode in 2 M  $\text{ZnSO}_4$  aqueous electrolyte: (a) cycling performance and (b) charge/discharge profiles at various cycles at  $50 \text{ mA g}^{-1}$



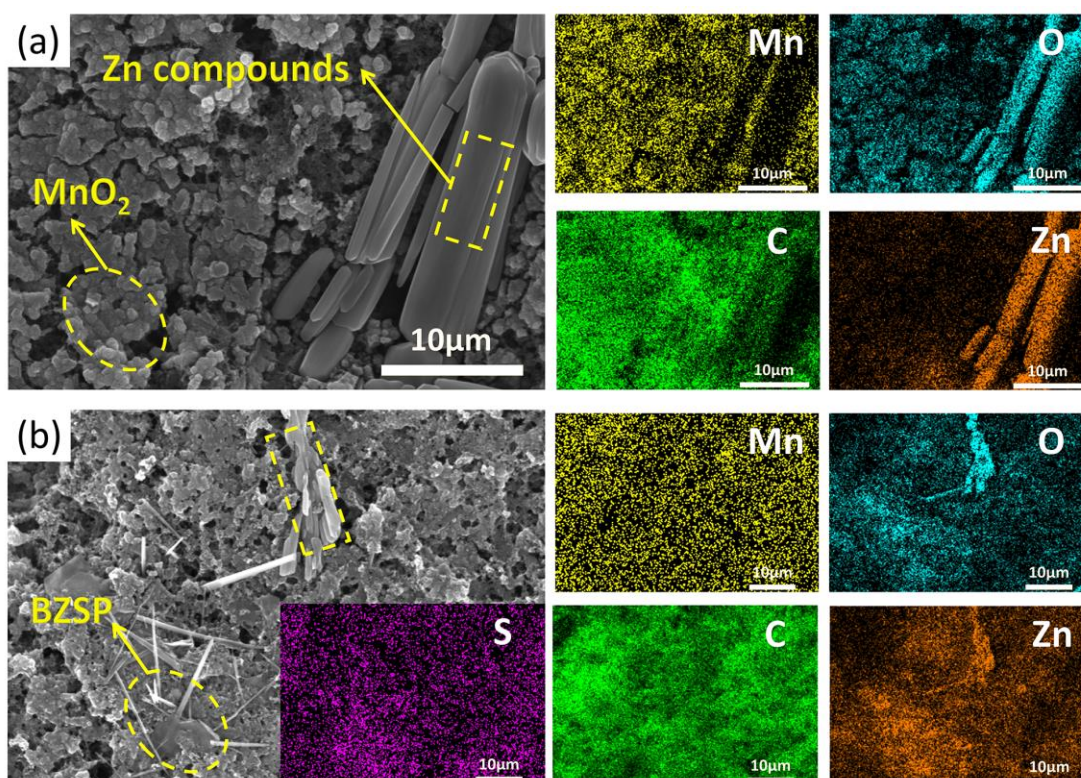

**Fig. S5** SEM images and EDS mapping of Mn(BTC) cathode at different charge/discharge states: (a) charge to 1.9 V and (b) then discharge to 1.0 V.

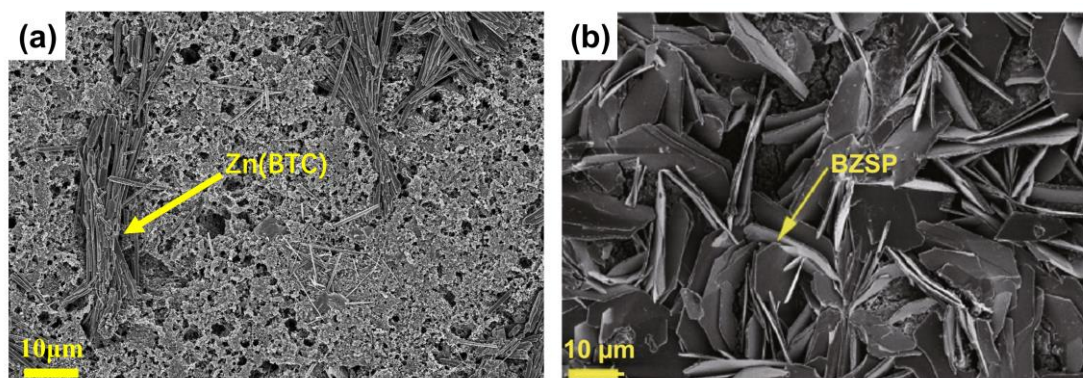

**Fig. S6** SEM images of (a) Mn(BTC) cathode and (b) previously reported MnO<sub>2</sub> cathode at fully discharged states [S6]

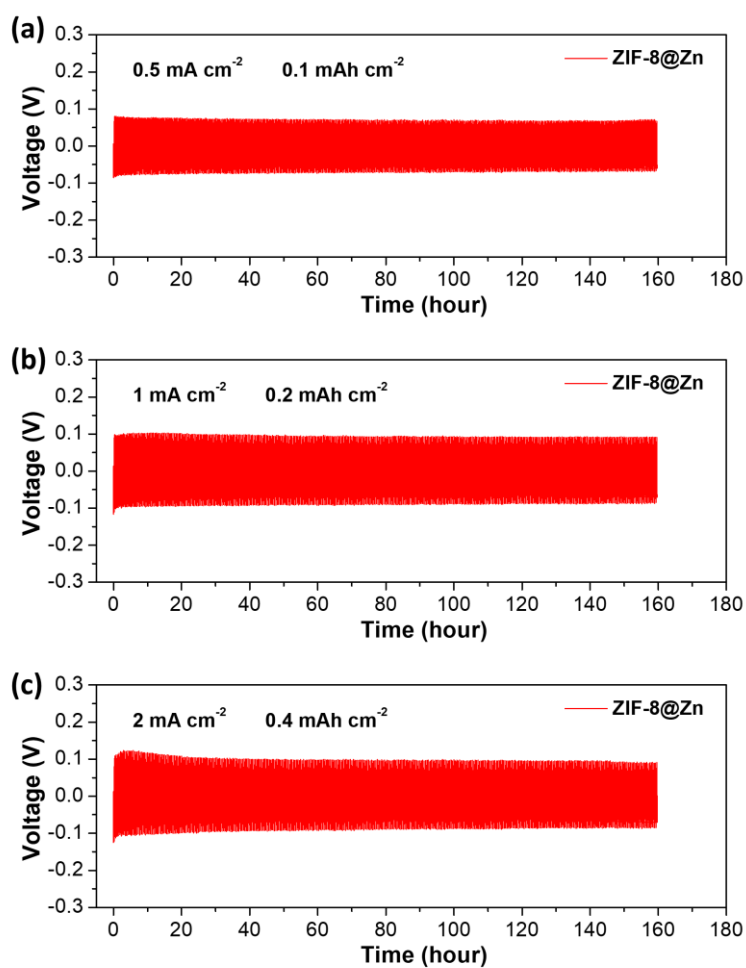

**Fig. S7** Cycling performance of ZIF-8@Zn||ZIF-8@Zn symmetrical batteries at different current densities of  $0.5\sim 2 \text{ mA cm}^{-2}$  and different charge/discharge capacities of  $0.1\sim 0.4 \text{ mAh cm}^{-2}$  in  $2 \text{ M ZnSO}_4$  electrolyte

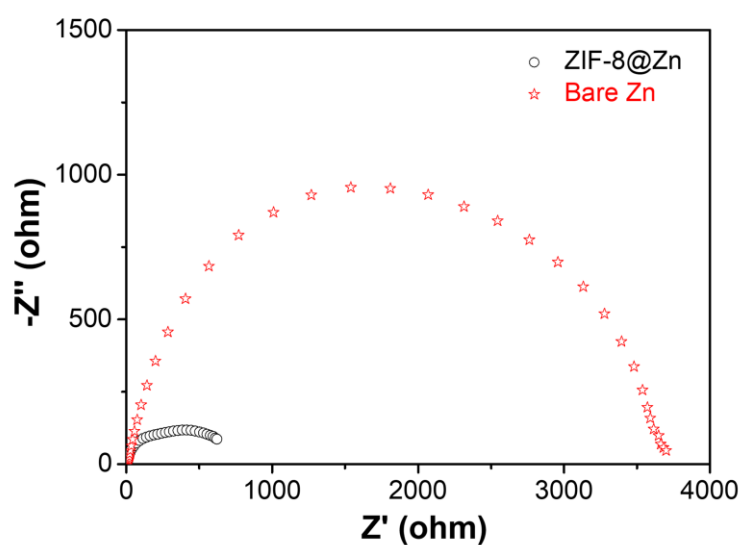

**Fig. S8** Nyquist plots of bare Zn and ZIF-8@Zn electrodes based symmetric cells

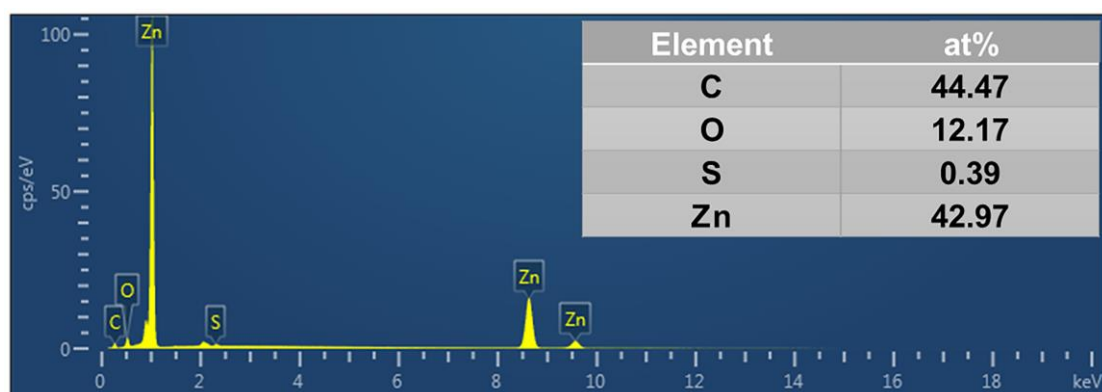

**Fig. S9** SEM-EDS result of bare Zn foil electrode after 100 stripping/plating cycles

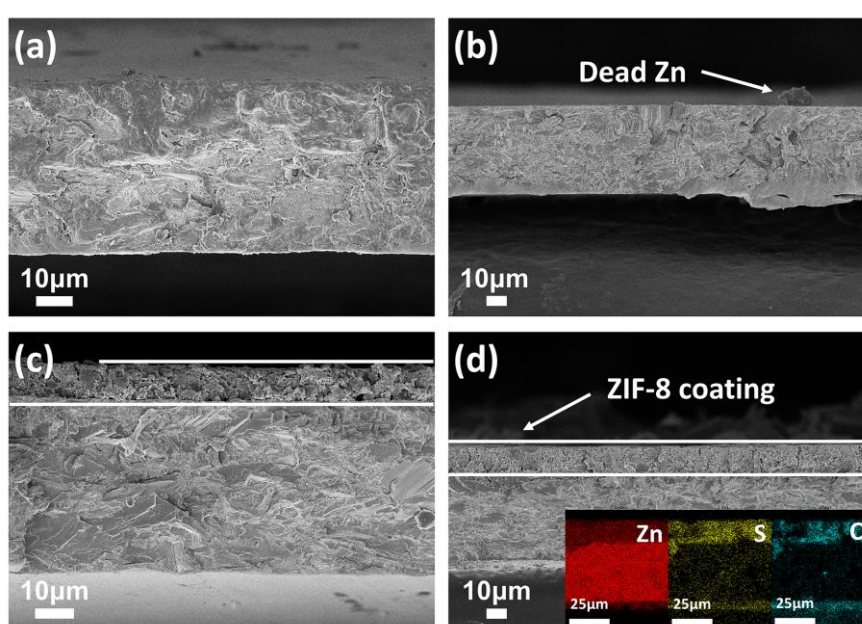

**Fig. S10** Cross-sectional SEM images of bare Zn electrode (a) before and (b) after 100 stripping/plating cycles. Cross-sectional SEM images of ZIF-8@Zn electrode (c) before and (d) after 100 stripping/plating cycles. Inset in (d) is EDS mapping of the cross-section

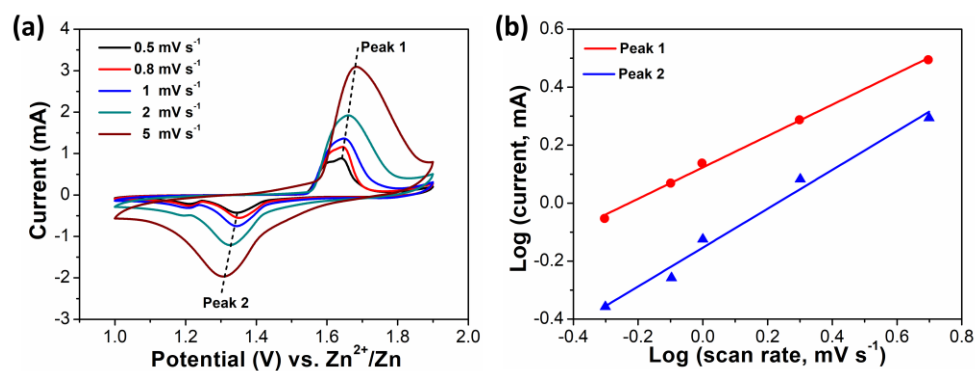

**Fig. S11** (a) CV curves of Mn(BTC) cathode//ZIF-8@Zn anode ZIBs in 2 M ZnSO<sub>4</sub> + 0.1 M MnSO<sub>4</sub> electrolyte at scan rates of 0.5, 0.8, 1, 2 and 5 mV s<sup>-1</sup>; (b) Dependence of log(*v*) and log(*i*) at various scan rates ranging from 0.5 to 5 mV s<sup>-1</sup>



**Table S1** Plasma atomic emission spectrometry (ICP-AES) results

| Electrolyte of different samples | Mn content (mg L <sup>-1</sup> ) |
|----------------------------------|----------------------------------|
| Original cathode                 | ≤0.05                            |
| Cathode charged to 1.8 V         | 6.15                             |
| Cathode charged to 1.9 V         | 4.62                             |

**Table S2** Comparison of cycling performance of different cathode materials for ZIBs

| Samples                                  | Electrolyte                                                          | Cycling performance            | Test current            | Ref.      |
|------------------------------------------|----------------------------------------------------------------------|--------------------------------|-------------------------|-----------|
| $\alpha$ -MnO <sub>2</sub>               | 1 M ZnSO <sub>4</sub>                                                | 63% retained after 50 cycles   | 83 mA g <sup>-1</sup>   | [S7]      |
| $\alpha$ -MnO <sub>2</sub>               | 1 M ZnSO <sub>4</sub>                                                | 66% retained after 30 cycles   | 10.5 mA g <sup>-1</sup> | [S8]      |
| $\alpha$ -MnO <sub>2</sub>               | 1 M ZnSO <sub>4</sub>                                                | 70% retained after 30 cycles   | 42 mA g <sup>-1</sup>   | [S9]      |
| $\delta$ -MnO <sub>2</sub>               | 1 M ZnSO <sub>4</sub>                                                | 46% retained after 100 cycles  | 83 mA g <sup>-1</sup>   | [S10]     |
| $\alpha$ -MnO <sub>2</sub><br>@CNT       | 2 M ZnSO <sub>4</sub><br>+ 0.5 M MnSO <sub>4</sub>                   | 99% retained after 500 cycles  | 5000 mA g <sup>-1</sup> | [S11]     |
| MnO <sub>2</sub>                         | 0.25 M ZnSO <sub>4</sub><br>+ 0.75 M Na <sub>2</sub> SO <sub>4</sub> | 53% retained after 1000 cycles | 3080 mA g <sup>-1</sup> | [S12]     |
| $\alpha$ -Mn <sub>2</sub> O <sub>3</sub> | 2 M ZnSO <sub>4</sub><br>+ 0.1 M MnSO <sub>4</sub>                   | 51% retained after 2000 cycles | 2000 mA g <sup>-1</sup> | [S13]     |
| Spinel<br>Mn <sub>3</sub> O <sub>4</sub> | 2 M ZnSO <sub>4</sub>                                                | 73% retained after 300 cycles  | 500 mA g <sup>-1</sup>  | [S14]     |
| ZnMn <sub>2</sub> O <sub>4</sub><br>@C   | 3 M Zn(CF <sub>3</sub> SO <sub>3</sub> ) <sub>2</sub>                | 94% retained after 500 cycles  | 500 mA g <sup>-1</sup>  | [S15]     |
| $\beta$ -MnO <sub>2</sub>                | 1 M ZnSO <sub>4</sub><br>+ 0.1 M MnSO <sub>4</sub>                   | 75% retained after 200 cycles  | 200 mA g <sup>-1</sup>  | [S16]     |
| Mn(BTC)                                  | 2 M ZnSO <sub>4</sub><br>+ 0.1 M MnSO <sub>4</sub>                   | 92% retained after 900 cycles  | 1000 mA g <sup>-1</sup> | This work |

## Supplementary References

[S1] Z. Cui, Q. Liu, C. Xu, R. Zou, J. Zhang et al., A new strategy to effectively alleviate volume expansion and enhance the conductivity of hierarchical MnO@C nanocomposites for lithium ion batteries. *J. Mater. Chem. A*. **5**(41), 21699-21708 (2017).

<https://doi.org/10.1039/c7ta05986h>

[S2] H. Hu, X. Lou, C. Li, X. Hu, T. Li et al., A thermally activated manganese 1,4-benzenedicarboxylate metal organic framework with high anodic capability for Li-ion batteries. *New J. Chem.* **40**(11), 9746-9752 (2016). <https://doi.org/10.1039/c6nj02179d>

[S3] K. M. L. Taylor-Pashow, J. D. Rocca, Z. Xie, S. Tran, W. Lin, Postsynthetic

modifications of iron-carboxylate nanoscale metal-organic frameworks for imaging and drug delivery. *J. Am. Chem. Soc.* **131**(40), 14261-14263 (2009). <https://doi.org/10.1021/ja906198y>

[S4] X. Hu, H. Hu, C. Li, T. Li, X. Lou et al., Cobalt-based metal organic framework with superior lithium anodic performance. *J. Solid State Chem.* **242**, 71-76 (2016). <https://doi.org/10.1016/j.jssc.2016.07.021>

[S5] T. Kim, H. Kim, T.-S. You, J. Kim, Carbon-coated V<sub>2</sub>O<sub>5</sub> nanoparticles derived from metal-organic frameworks as a cathode material for rechargeable lithium-ion batteries. *J. Alloys Compd.* **727**, 522-530 (2017). <https://doi.org/10.1016/j.jallcom.2017.08.179>

[S6] Y. Huang, J. Mou, W. Liu, X. Wang, L. Dong et al., Novel insights into energy storage mechanism of aqueous rechargeable Zn/MnO<sub>2</sub> batteries with participation of Mn<sup>2+</sup>. *Nano-Micro Lett.* **11**(1), 49 (2019). <https://doi.org/10.1007/s40820-019-0278-9>

[S7] M. H. Alfaruqi, J. Gim, S. Kim, J. Song, J. Jo et al., Enhanced reversible divalent zinc storage in a structurally stable  $\alpha$ -MnO<sub>2</sub> nanorod electrode. *J. Power Sources.* **288**, 320-327 (2015). <https://doi.org/10.1016/j.jpowsour.2015.04.140>

[S8] B. Lee, C. S. Yoon, H. R. Lee, K. Y. Chung, B. W. Cho et al., Electrochemically-induced reversible transition from the tunneled to layered polymorphs of manganese dioxide. *Sci. Rep.* **4**, 6066 (2014). <https://doi.org/10.1038/srep06066>

[S9] B. Lee, H. R. Lee, H. Kim, K. Y. Chung, B. W. Cho et al., Elucidating the intercalation mechanism of zinc ions into  $\alpha$ -MnO<sub>2</sub> for rechargeable zinc batteries. *Chem. Commun.* **51**, 9265-9268 (2015). <https://doi.org/10.1039/C5CC02585K>

[S10] M. H. Alfaruqi, J. Gim, S. Kim, J. Song, D. T. Pham et al., A layered  $\delta$ -MnO<sub>2</sub> nanoflake cathode with high zinc-storage capacities for eco-friendly battery applications. *Electrochem. Commun.* **60**, 121-125 (2015). <https://doi.org/10.1016/j.elecom.2015.08.019>

[S11] D. Xu, B. Li, C. Wei, Y.-B. He, H. Du et al., Preparation and characterization of MnO<sub>2</sub>/acid-treated CNT nanocomposites for energy storage with zinc ions. *Electrochim. Acta.* **133**, 254-261 (2014). <https://doi.org/10.1016/j.electacta.2014.04.001>

[S12] J. S. Ko, M. B. Sassin, J. F. Parker, D. R. Rolison, Jeffrey W. Long, Combining battery-like and pseudocapacitive charge storage in 3D MnO<sub>x</sub>@carbon electrode architectures for zinc-ion cells. *Sustain. Energy Fuels.* **2**(3), 626-636 (2018). <https://doi.org/10.1039/c7se00540g>

[S13] B. Jiang, C. Xu, C. Wu, L. Dong, J. Li et al., Manganese sesquioxide as cathode material for multivalent zinc ion battery with high capacity and long cycle life. *Electrochim. Acta.* **229**, 422-428 (2017). <https://doi.org/10.1016/j.electacta.2017.01.163>

[S14] J. Hao, J. Mou, J. Zhang, L. Dong, W. Liu et al., Electrochemically induced spinel-layered phase transition of Mn<sub>3</sub>O<sub>4</sub> in high performance neutral aqueous rechargeable zinc battery. *Electrochim. Acta.* **259**, 170-178 (2018). <https://doi.org/10.1016/j.electacta.2017.10.166>

[S15] N. Zhang, F. Cheng, Y. Liu, Q. Zhao, K. Lei et al., Cation-deficient spinel ZnMn<sub>2</sub>O<sub>4</sub> cathode in Zn(CF<sub>3</sub>SO<sub>3</sub>)<sub>2</sub> electrolyte for rechargeable aqueous Zn-ion battery. *J Am. Chem.*

Soc. **138**(39), 12894-12901 (2016). <https://doi.org/10.1021/jacs.6b05958>

[S16] S. Islam, M. H. Alfaruqi, V. Mathew, J. Song, S. Kim et al., Facile synthesis and the exploration of the zinc storage mechanism of  $\beta$ -MnO<sub>2</sub> nanorods with exposed (101) planes as a novel cathode material for high performance eco-friendly zinc-ion batteries. *J. Mater. Chem. A.* **5**(44), 23299-23309 (2017). <https://doi.org/10.1039/c7ta07170a>
